# Supplementary material
Source: Springer Nature journal article supplement (https://www.springermedizin.de/resource/supplementary/12891_2008_596_MOESM1_ESM.pdf/9506316)

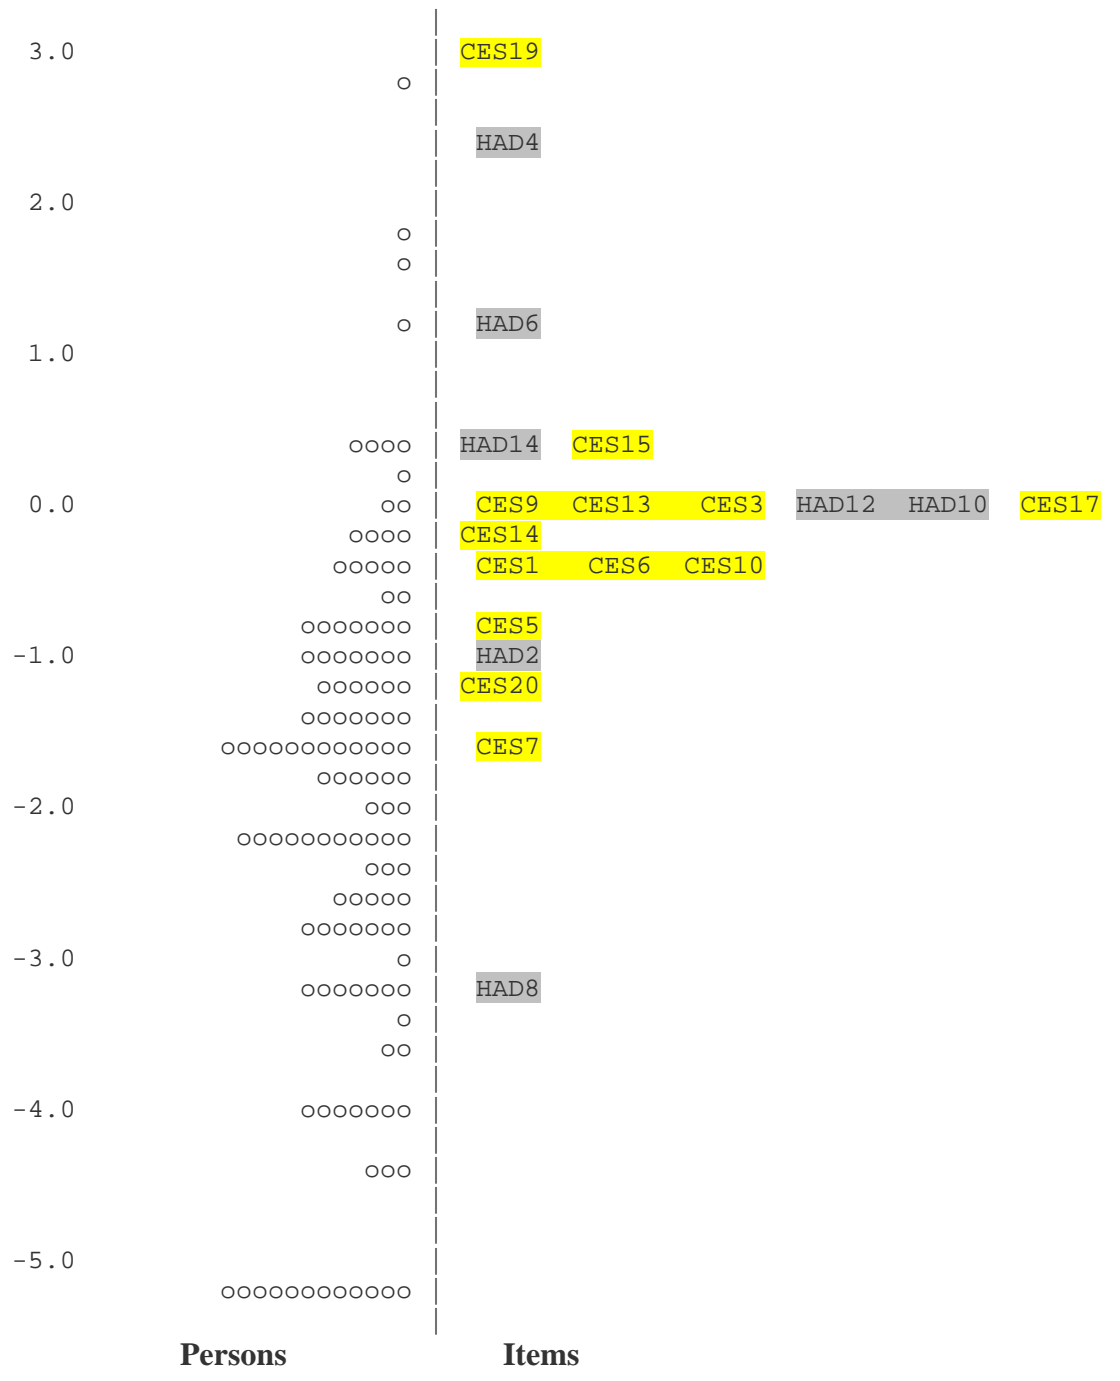

Supplement: MOESM1 [file 9506316]
